# Supplementary material
Source: PubMed Central journal article supplement (PMC5892193)
Supplement: NIHMS950345-supplement-SI.pdf [file NIHMS950345-supplement-SI.pdf]

## SUPPORTING INFORMATION

### Tuning Inner-Ear Tip-Link Affinity Through Alternatively Spliced Variants of Protocadherin-15

Yoshie Narui and Marcos Sotomayor\*

The Ohio State University, Department of Chemistry and Biochemistry, Columbus, Ohio 43210

**Figure S1.** Expression and purification of pcdh15 variants.

**Figure S2.** Purification and validation of cdh23-pcdh15(N2) complex.

**Figure S3.** MALS analysis verifies monomeric state of pcdh15(N5).

**Figure S4.** Analytical SEC analysis of pcdh15 variants and complexes.

**Figure S5.** Unbinding trajectory paths for canonical and noncanonical complexes.

**Figure S6.** Scheme depicting potential pcdh15-pcdh15 dimers that may interact with cdh23.

**Table S1.** Summary of SMD simulations.

**VARIANT**

**AMINO ACID SEQUENCE**

**SEC/SDS GEL**

**N1**

**QYDDDWQYEDCKLARGGPPATIVAID**  
**EESRN**GTILVDNMLIKGTAGGPDPTIE  
 LSLKDNVDYVWLLDPVKQMLFLNSTG  
 RVLDRDPPMNIHSIVVQVCVNKKVVG  
 TVIYHEVRIVVRDRNDNSPTFKHESYY  
 ATVNELTPVGTTFITGFGSDNGATDID  
 DGPNGQIEYVIQYNPEDPTSNDTFEIP  
 LMLTGNVVLKRLNYEDKTRYYVIIQA  
 NDRAQNLNERRTTTTTLTVD

UniProt entry:  
 Q99PJ1-1  
 Accession no.:  
 AAG53891  
 MW=26.2 kDa;  
 233 aa

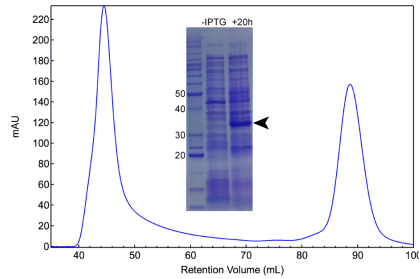

**N2**

**QYDDCKLARGGPPATIVAIDEESRN**  
 GTILVDNMLIKGTAGGPDPTIELSLKD  
 NVDYVWLLDPVKQMLFLNSTGRVLD  
 RDPPMNIHSIVVQVCVNKKVGTVIY  
 HEVRIVVRDRNDNSPTFKHESYYATV  
 NELTPVGTTFITGFGSDNGATDIDDGP  
 NGQIEYVIQYNPEDPTSNDTFEIPLML  
 TGNVVLKRLNYEDKTRYYVIIQAND  
 RAQNLNERRTTTTTLTVD

UniProt entry:  
 Q99PJ1-2  
 Accession no.:  
 DQ354396  
 MW=25.5 kDa;  
 228 aa

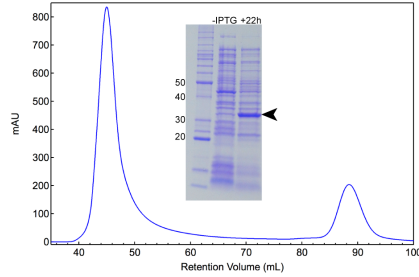

**N3**

**QYDD**GTILVDNMLIKGTAGGPDPTIELS  
 LKDNVDYVWLLDPVKQMLFLNSTGRV  
 LDRDPPMNIHSIVVQVCVNKKVGTVI  
 YHEVRIVVRDRNDNSPTFKHESYYATV  
 NELTPVGTTFITGFGSDNGATDIDDGP  
 NGQIEYVIQYNPEDPTSNDTFEIPLMLT  
 GNVVLKRLNYEDKTRYYVIIQANDRA  
 QNLNERRTTTTTLTVD

UniProt entry:  
 Q99PJ1-8  
 Accession no.:  
 DQ354402  
 MW=23.3 kDa;  
 206 aa

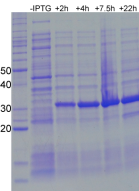

**N4**

**QYDDCKLARGGPPATIVAIDEESRN**  
 GTILVDNMLIKGTAGGPDPTIELSLKD  
 NVDYVWLLDPVKQMLFLNSTGRVLD  
 RDPPMNIHSIVVQVCVNKKVGTVIY  
 HEVRIVVRDRNDNSPTFKHESYYATV  
 NELTPVGTTFITGFGSDNGATDIDDGP  
 NGQIEYVIQYNPEDPDRAQNLNERRT  
 TTTTTLVD

UniProt entry:  
 Q99PJ1-7  
 Accession no.:  
 DQ354401  
 MW=21.1 kDa;  
 191 aa

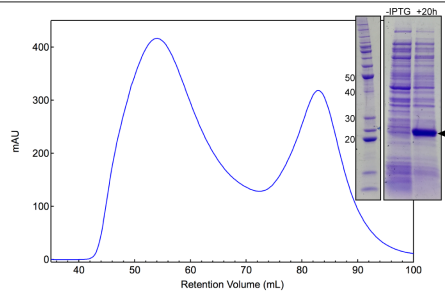

**N5**

MTMAEQDNGHPLPAFASLHIEILDEN  
 NQSPYFTMPYQGYILESAPVGTATISE  
 SLNLTPLRIVALDKDIEDVPPGGVPT  
 KDPELHLFLNDYTSVFTVTPTGITRYL  
 TLLQPVDREEQQTYYFLITAFDGVQE  
 SEPVVVNIQVMDANDNTPTTFPEISYD  
 VYVYDMSPGDSVIQLTAVDADEGSN  
 GEISYEILVGGKGFVINKTGLVSIAP  
 GVELIVGQTYALTVAQSDNAPPAERR  
 HSICTVYIEVLPNNQSPPRF

Accession no.:  
 DQ354407  
 MW=28.3 kDa;  
 260 aa

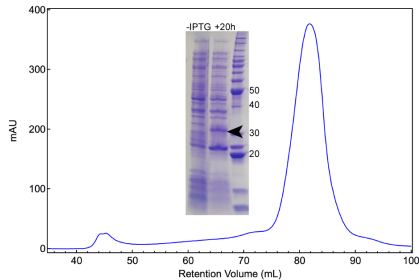

**N6**

**QYDD**HSICTVYIEVLPNNQSPPRFP  
 QLMYSLEVSEAMRIGAILNLQATDRE  
 GDPITYAIENGDPQRFNLSETTGILS  
 LGKALDRESTDRIYLIVTASDGRPDGT  
 STATVNIIVTDVNDNAPVFDPLYLPRNL  
 SVVEEENAFVGVQVRATDPDAGING  
 QVHYSLGNFNNLFRITSNYSIYAVKL  
 NREARDHYELVVVATDGAHVPRHSTL  
 TLYIKVLDIDDNSPVF

UniProt entry:  
 Q99PJ1-24  
 Accession no.:  
 AAY24693  
 MW=25.1 kDa;  
 228 aa

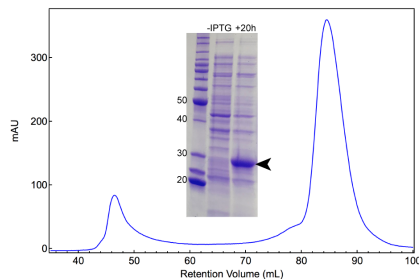

**Figure S1.** Expression and purification of pcdh15 variants. For each of the variants studied, the UniProt entry code, accession number, and predicted molecular weight are provided in the leftmost column. The amino acid sequence of the two N-terminal EC repeats included in the construct, excluding the start codon (Met) and the hexahistidine tag (including any additional residues due to cloning) are provided in the center column. The sequence is color coded to highlight the end of exon 2 in red, exon 3 in cyan, and exon 4 in purple. The right column shows SDS gels before and after inducing protein expression, and SEC chromatograms of refolded pcdh15 variants. Peaks of aggregated protein are expected near ~45-50 mL and homogenous, refolded two EC repeat constructs are expected at a retention volume between 80-90 mL (Superdex 200 16/600 column).

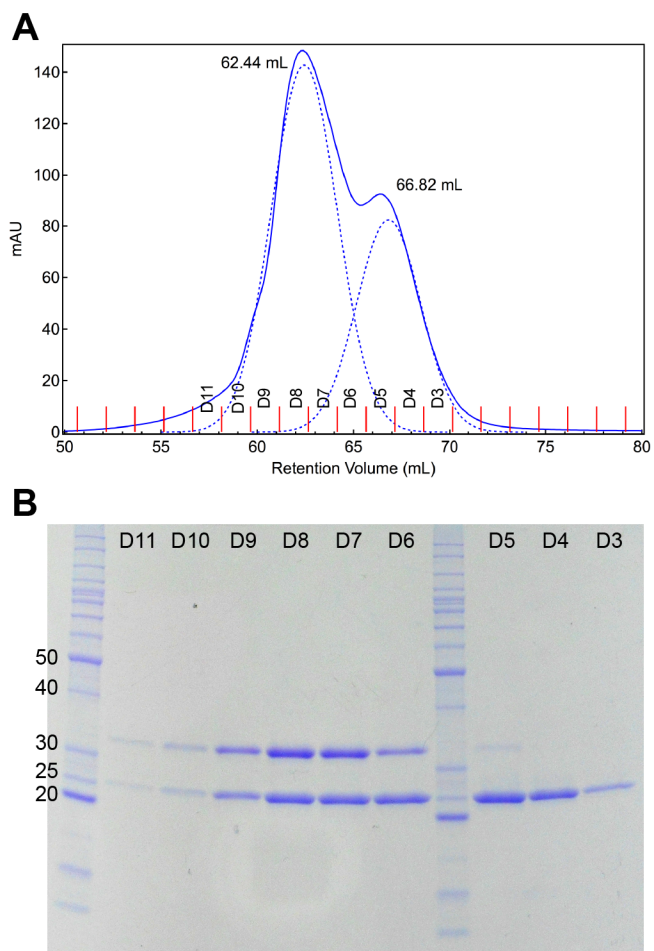

**Figure S2.** Purification and validation of cdh23-pcdh15(N2) complex. (A) SEC chromatogram displays a new peak at 62.44 mL, which represents the cdh23-pcdh15(N2) complex. The peak at 66.82 mL represents excess cdh23. Dotted lines are theoretical fits used to estimate retention volumes. The sample was analyzed on a Superdex 75 16/600 column. (B) Fractions from the SEC run were analyzed by SDS PAGE. Fractions D9-D6 were combined, concentrated, and utilized for crystal growth.

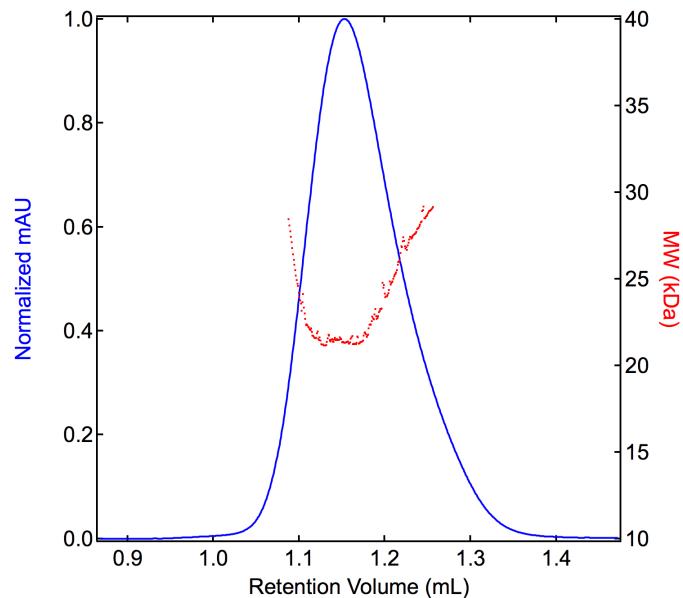

**Figure S3.** MALS analysis verifies monomeric state of pcdh15(N5). The refolded sample of pcdh15(N5) was analyzed on the AKTAMicro system connected in series with a Wyatt miniDAWN TREOS system. Protein absorbance at 280 nm was monitored (blue trace) as was light scattering from the sample, which was subsequently converted into molecular weight using a rod-like model (red dots). The predicted monomer mass of variant N5 is 28.3 kDa, while the measured value was  $\sim 26.0$  kDa, which does not approach the molecular weight of a dimeric protein.

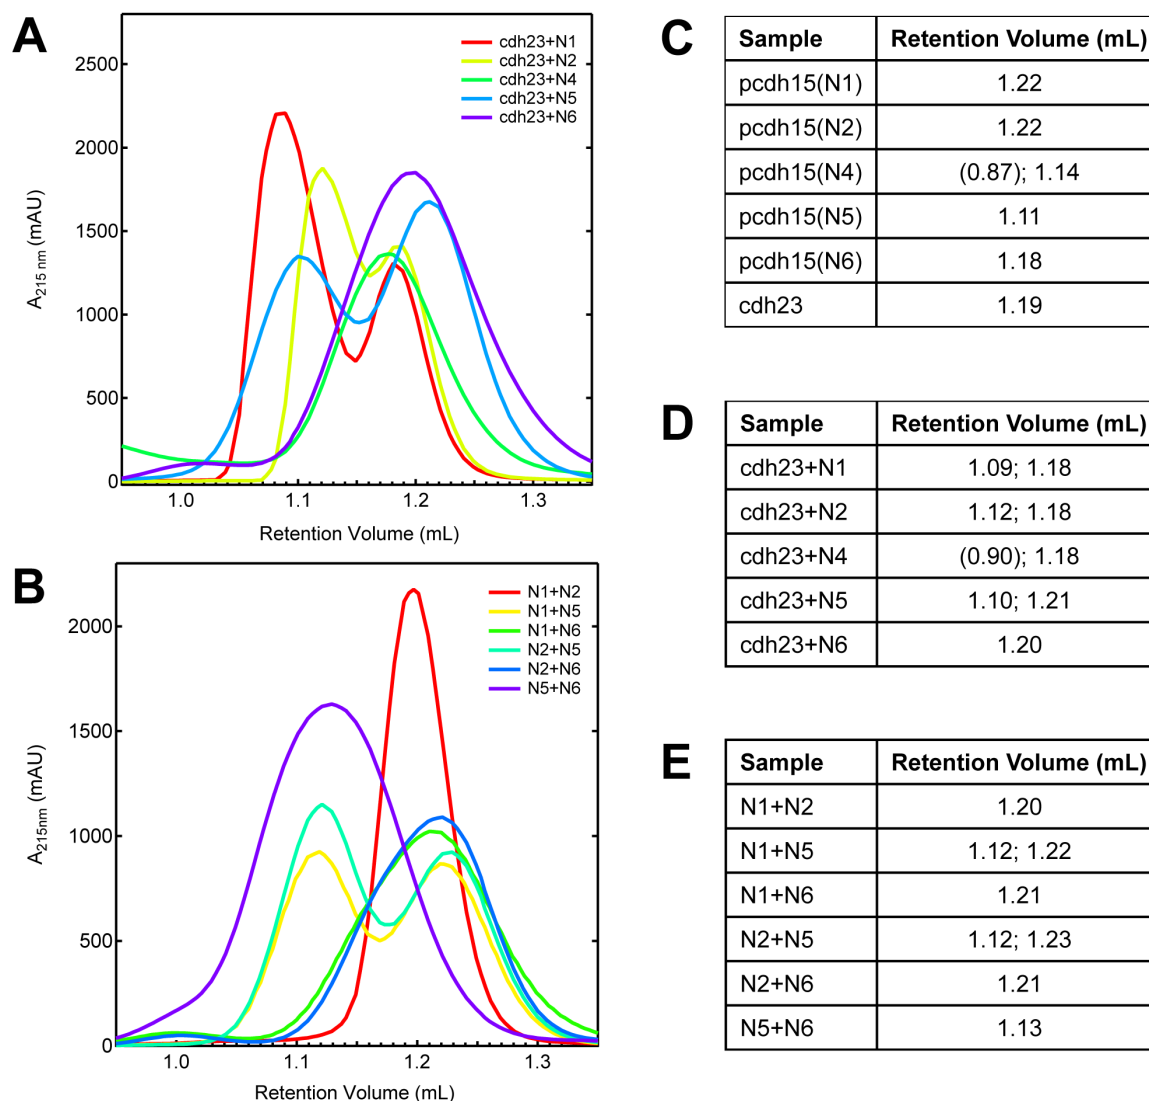

**Figure S4.** Analytical SEC analysis of pcdh15 variants and complexes. (A) Heterophilic mixtures of cdh23 and pcdh15. (B) Pseudo-heterophilic mixtures of pcdh15 variants. (C-E) Tables of peak retention volumes for individual proteins (C), heterophilic complexes (D), and pseudo-heterophilic complexes (E) of pcdh15 variants. Peaks in parentheses are present in the chromatogram but not visible in the plots due to the axis scale.

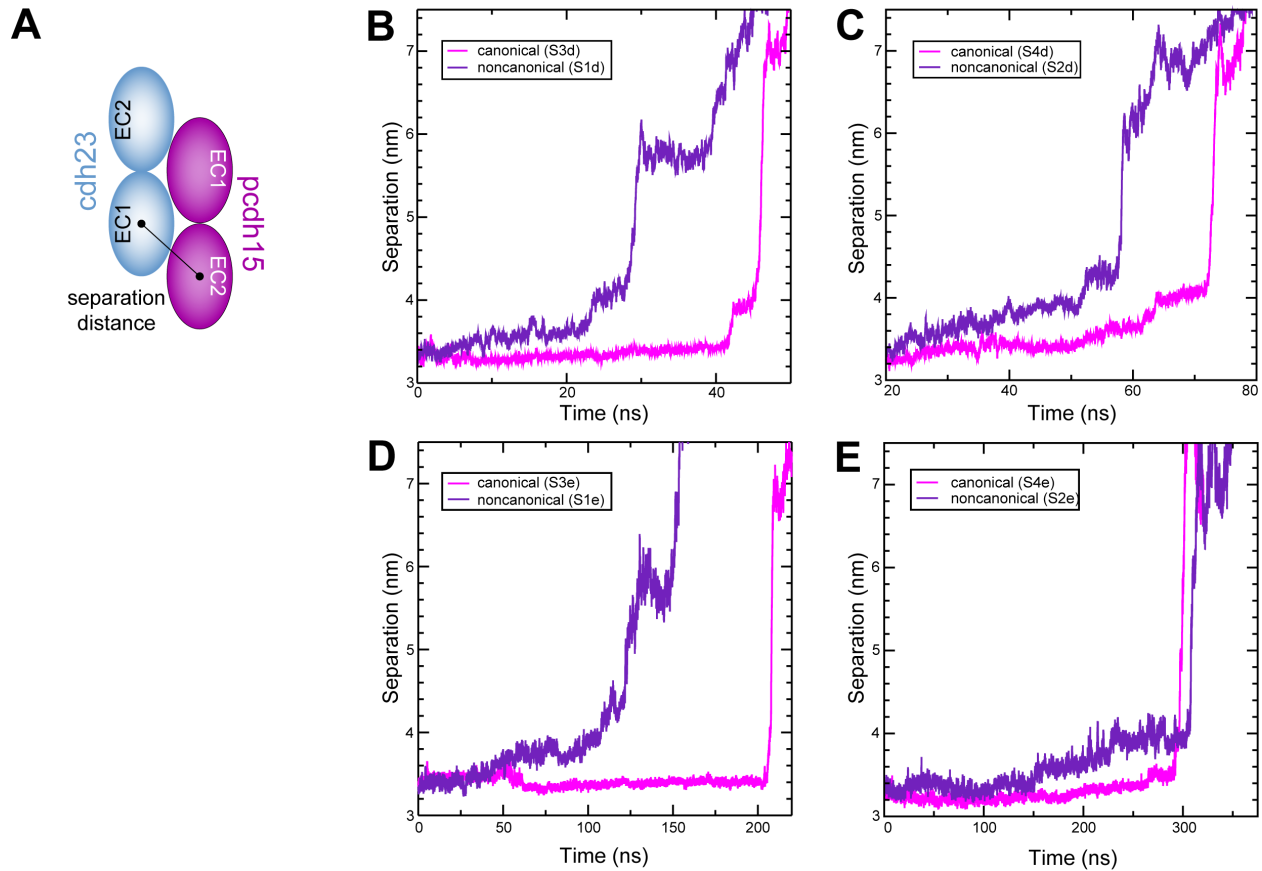

**Figure S5.** Unbinding trajectory paths for canonical and noncanonical complexes. (A) Separation distance between the centers of mass of cdh23 EC1 and pcdh15 EC2 plotted as a function of time for pulling at 0.1 nm/ns after the complexes were equilibrated for (B) 1 ns, and (C) 10 ns. Similar data are shown when the complexes were pulled at 0.02 nm/ns and equilibrated for (D) 1 ns, and (E) 10 ns. Simulations with low unbinding force (S1d and S1e) follow a distinct unbinding path in which EC1 of cdh23 separates earlier from pcdh15.

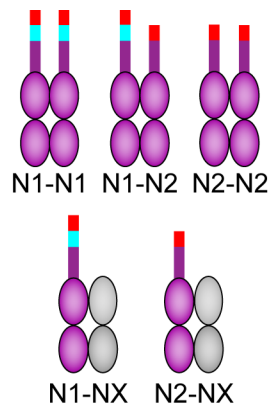

**Figure S6.** Scheme depicting potential pcdh15-*pcdh15* dimers that may interact with *cdh23*. Five different combinations of PCDH15 may be observed in hair cells. NX represents other *pcdh15* variants, such as N3, which could also bind with N1 or N2. These dimers could form heterotetrameric complexes with *cdh23*.



**Table S1.** Summary of SMD simulations.

| Label         | PDB  | $t_{\text{sim}}$ (ns) | Type            | Start | Speed (nm/ns) | Average Peak Force (pN) <sup>b</sup> | Size (#atoms) | Size (nm <sup>3</sup> ) |
|---------------|------|-----------------------|-----------------|-------|---------------|--------------------------------------|---------------|-------------------------|
| S1a           | 4XXW | 1                     | EQ <sup>a</sup> | –     | –             |                                      | 153,825       | 27.9 x 8.5 x 7.0        |
| S1b           |      | 2                     | SMD             | S1a   | 10            | 1409.5                               |               |                         |
| S1c           |      | 6.5                   | SMD             | S1a   | 1             | 669.8                                |               |                         |
| S1d           |      | 98.9                  | SMD             | S1a   | 0.1           | 474.3                                |               |                         |
| S1e           |      | 222.3                 | SMD             | S1a   | 0.02          | 397.1                                |               |                         |
| S2a           | 4XXW | 20                    | EQ <sup>a</sup> | S1a   | –             |                                      | 153,825       | 27.9 x 8.5 x 7.0        |
| S2b           |      | 4                     | SMD             | S2a   | 10            | 1259.5                               |               |                         |
| S2c           |      | 20.2                  | SMD             | S2a   | 1             | 765.9                                |               |                         |
| S2d           |      | 127.0                 | SMD             | S2a   | 0.1           | 694.7                                |               |                         |
| S2e           |      | 357.8                 | SMD             | S2a   | 0.02          | 634.3                                |               |                         |
| S3a           | 4AQ8 | 1                     | EQ <sup>a</sup> | –     | –             |                                      | 161,038       | 28 x 8.2 x 7.5          |
| S3b           |      | 4                     | SMD             | S3a   | 10            | 1246.8                               |               |                         |
| S3c           |      | 20                    | SMD             | S3a   | 1             | 685.6                                |               |                         |
| S3d           |      | 111.2                 | SMD             | S3a   | 0.1           | 794.4                                |               |                         |
| S3e           |      | 221.8                 | SMD             | S3a   | 0.02          | 774.9                                |               |                         |
| S4a           | 4AQ8 | 20                    | EQ <sup>a</sup> | S3a   | –             |                                      | 161,038       | 28 x 8.2 x 7.5          |
| S4b           |      | 4                     | SMD             | S4a   | 10            | 1340.8                               |               |                         |
| S4c           |      | 19.4                  | SMD             | S4a   | 1             | 802.0                                |               |                         |
| S4d           |      | 91.7                  | SMD             | S4a   | 0.1           | 579.1                                |               |                         |
| S4e           |      | 343.0                 | SMD             | S4a   | 0.02          | 591.3                                |               |                         |
| <b>Total:</b> |      | 1846.1                |                 |       |               |                                      |               |                         |

<sup>a</sup>EQ indicates equilibration on the system where the backbone was unconstrained.

<sup>b</sup>Average peak force is calculated from the peak force measured on both C-terminal atoms used (using 50-ps running averages).
